# Supplementary material for: Connector Inversion Probe Technology: A Powerful One-Primer Multiplex DNA Amplification System for Numerous Scientific Applications
Source: PLOS journal article supplement (doi:10.1371/journal.pone.0000915), 2007-09-18
Supplement: S3 (10.1371/journal.pone.0000915.s003) [file journal.pone.0000915.s003]

\*\*\* \* \*\*      \*\*      \*\*\*\*\* \*      \*\* \* \*\* \*      \* \*\* \*

GP5+6+ TTTGTTACTGTGGTAGATACTACNNNGAATATGATTTACAGTTTATTTTTC

HPV-6B TTTGTTACTGTGGTAGATACCACNNNGAGTATGATTTACAATTTATTTTTC

HPV-10 TTTGTTACTGTGGTAGACACGACNNNGAATATGATTTGCAGTTCATTTTTC

HPV-11 TTTGTTACTGTGGTAGATACCACNNNGAGTTTGATTTACAGTTTATTTTTC

HPV-16 TTTGTTACTGTTGTTGATACTACNNNGAATATGATTTACAGTTTATTTTTC

HPV-18 TTTGTTACTGTGGTAGATACCACNNNGAATATGATTTGCAGTTTATTTTTC

HPV-26 TTTGTTACCTGTGTTGATACCACNNNGAATATGAATTACAATTTATATTTTC

HPV-27 TTTCTGACTGTGGTGGACACCACNNNGAGTATGATTTGCAGTTCATTTTCC

HPV-28 TTTGTAAGTGTAGTGGATACTACNNNGAGTACGATTTGCAGTTTATATTTCC

HPV-29 TTTTAACTGTGGTGGACACCACNNNGAATATGATTTGCAGTTTATTTTCC

HPV-32 TTTCTAACTGTTGTGGATACTACNNNGAATATGATATACAGTTTATATTTTC

HPV-33 TTTGTTACTGTGGTAGATACCACNNNGAATATGATCTACAGTTTGTGTTTTTC

HPV-34 TTTTAACTGTTGTAGATACTACNNNGAGTATGACCTGCAGTTTGTGTTTTTC

HPV-35 TTTGTTACTGTAGTTGATACAACNNNGAATATGATTTACAGTTTATTTTTC

HPV-39 TTTCTTACTGTTGTGGACACTACNNNGAGTATGATTTACAATTTATATTTTC

HPV-40 TTTGTTACAGTTGTAGACACCACNNNGAGTTTGATTTGCAGTTTATTTTTC

HPV-42 TTTTAACTGTGGTTGATACTACNNNGAATATGATGTGCAATTTATATTTTC

HPV-44 TTTGTTACTGTTGTAGATACTACNNNGAGTTTGACTTACAATTTATGTTTTTC

HPV-45 TTTGTTACTGTAGTGGACACTACNNNGAATATGATTTACAGTTTATTTTTC

HPV-52 TTTGTCACAGTTGTGGATACCACNNNGAATTTGATTTACAATTTATTTTTC

HPV-53 TTTGTAAGTGTGTGGATACCACNNNGAATATGAATTACAATTTGTGTTTTTC

HPV-54 TTTTAAACAGTTGTAGATACCACNNNGAATATGATTTACAGTTTATATTTTC

HPV-56 TTTGTTACTGTAGTAGATACTACNNNGAATATGAATTACAATTTGTTTTTTC

HPV-58 TTTGTTACCGTGGTTGATACCACNNNGAATATGACTTACAGTTTGTTTTTTC

HPV-59 TTTTAAACAGTTGTAGATACTACNNNGAATTTGATTTGCAGTTTATATTTTC

HPV-62 TTTGTTACTGTGGTGGATACTACNNNGAATTTGATTTGCAATTTATATTTTC

HPV-66 TTTGTTACTGTTGTGGATACTACNNNGAATATGAACCTACAGTTTGTGTTTTTC

HPV-67 TTTGTTACTGTTGTAGACACTACNNNGAATATGATTTGCAGTTTATATTTTC

HPV-69 TTTGTTACTTGTGTAGATACTACNNNGAATATGAATTACAGTTTATATTTTC

HPV-70 TTTATTACTGTGGTGGACACTACNNNGAATATGATTTACAATTTATATTTTC

HPV-71 TTTGTAACAGTTGTGACACATCANNNGAATTTGATTTGCAATTTATATTTTC

HPV-72 TTTGTGACAGTTGTAGATACTACNNNGAATTTGATTTGCAGTTTATATTTTC

HPV-73 TTTTAACTGTTGTAGATACTACNNNGAGTTTGATTTACAGTTTGTTTTTTC

HPV-74 TTTGTTACAGTTGTGGATACCACNNNGAATTTGATTTGCAATTTATTTTTC

HPV-81 TTTGTTACAGTGGTGGATACTACNNNGAATATGATTTGCAGTTTATTTTCC

HPV-82 TTTATTACTTGTGTTGACACTACNNNGAATATGAATTGCAATTTATATTTTC

HPV-84 TTTGTCACGGTGGTAGATACCACNNNGAATATGATTTGCAGTTTATATTCC

HPV-86 TTTGTTACTGTGGTCGACACCACNNNGAATATGATTTGCAATTTATTTTTC

HPV-89 TTTGTTACTGTGGTGGATACCACNNNGAATATGACCTACAGTTTATATTCC

HPV-90 TTTGTAAGTGTGGTTGATACTACNNNGAATTTGATTTGCAGTTTATTTTCC

HPV-91 TTTGTAAGTGTGTGGATACAACNNNGAATTTGATTTACAGTTTATATTTTC

**Figure S3.** Genomic regions GP5+/6+ aligned for 40 genotypes detected by either CSP-CIPer or GP5+/6+ PCR (Table 1). Alignment was performed and displayed with ClustalX (<http://www.biodirectory.com/biowiki/ClustalX>). The targeted region flanking the two primers varies between 90-100 base pairs depending on genotype characteristics, and is represented in the figure with three Ns.
